1 **Redundancy in synaptic connections enables neurons to learn optimally**

2

3 Naoki Hiratani<sup>1,2\*</sup> and Tomoki Fukai<sup>1</sup>

4 <sup>1</sup>Laboratory for Neural Circuit Theory, RIKEN Brain Science Institute, Wako, Saitama, Japan,  
5 351-0198

6 <sup>2</sup>Gatsby Computational Neuroscience Unit, University College London, London, United  
7 Kingdom, W1T 4JG

8 \*correspondence: N.Hiratani@gmail.com

9

10 **Keywords:** synaptic plasticity, connectomics, dendritic computation

11

12

13 **Abstract**

14 Recent experimental studies suggest that, in cortical microcircuits of the mammalian brain,  
15 the majority of neuron-to-neuron connections are realized by multiple synapses. However,  
16 it is not known whether such redundant synaptic connections provide any functional benefit.  
17 Here, we show that redundant synaptic connections enable near-optimal learning in  
18 cooperation with synaptic rewiring. By constructing a simple dendritic neuron model, we  
19 demonstrate that with multisynaptic connections, synaptic plasticity approximates a  
20 sample-based Bayesian filtering algorithm known as particle filtering, and wiring plasticity  
21 implements its resampling process. Applying the proposed framework to a detailed single  
22 neuron model, we show that the model accounts for many experimental observations,  
23 including the dendritic position dependence of spike-timing-dependent plasticity, and the  
24 functional synaptic organization on the dendritic tree based on the stimulus selectivity of  
25 presynaptic neurons. Our study provides a novel conceptual framework for synaptic  
26 plasticity and rewiring.

27

28

29

30

## 31 **Introduction**

32 Synaptic connection between neurons is the fundamental substrate for learning and  
33 computation in neural circuits. Previous morphological studies suggest that in cortical  
34 microcircuits, often several synaptic connections are found between the presynaptic axons  
35 and the postsynaptic dendrites of two connected neurons (Deuchars et al., 1994; Markram  
36 et al., 1997; Feldmeyer et al., 1999). Recent connectomics studies confirmed these  
37 observations in somatosensory (Kasthuri et al., 2015), visual (Lee et al., 2016), and  
38 entorhinal (Schmidt et al., 2017) cortex, and also in hippocampus (Bartol et al., 2015). In  
39 particular, in barrel cortex, the average number of synapses per connection is estimated to  
40 be around 10 (Gal et al., 2017). However, the functional importance of multisynaptic  
41 connections remains unknown. Especially, from a computational perspective, such  
42 redundancy in connection structure is potentially harmful for learning due to degeneracy  
43 (Watanabe, 2001; Amari et al., 2006). In this work, we study how neurons perform learning  
44 with multisynaptic connections and whether redundancy provides any benefit, from a  
45 Bayesian perspective.

46 Bayesian framework has been established as a candidate principle of information  
47 processing in the brain (Knill and Pouget, 2004; Körding and Wolpert, 2006). Many results  
48 further suggest that not only computation, but learning process is also near optimal in  
49 terms of Bayesian for given stream of information (Behrens et al., 2007; Lake et al., 2015;  
50 Madarasz et al., 2016), yet its underlying plasticity mechanism remains largely elusive.  
51 Previous theoretical studies revealed that Hebbian-type plasticity rules eventually enable  
52 neural circuits to perform optimal computation under appropriate normalization (Soltani  
53 and Wang, 2010; Nessler et al., 2013). However, these rules are not optimal in terms of  
54 learning, so that the learning rates are typically too slow to perform learning from a limited  
55 number of observations. Recently, some learning rules are proposed for rapid learning  
56 (Aitchison and Latham, 2014; Gütig, 2016), yet their biological plausibility are still  
57 debatable. Here, we propose a novel framework of non-parametric near-optimal learning  
58 using multisynaptic connections. We show that neurons can exploit the variability among  
59 synapses in a multisynaptic connection to accurately estimate the causal relationship  
60 between pre- and postsynaptic activity. The learning rule is first derived for a simple neuron

61 model, and then implemented in a detailed single neuron model. The derived rule is  
62 consistent with many known properties of dendritic plasticity and synaptic organization,  
63 including a recent finding on the dendritic retinotopy in Layer 2/3 (L2/3) pyramidal neurons  
64 of rodent visual cortex (Iacaruso et al., 2017). Furthermore, the model reveals potential  
65 functional roles of anti-Hebbian synaptic plasticity observed in distal dendrites (Letzkus et  
66 al., 2006; Sjöström and Häusser, 2006).

67

## 68 **Results**

### 69 *A conceptual model of learning with multisynaptic connections*

70 Let us first consider a model of two neurons connected with  $K$  numbers of synapses (Fig. 1A)  
71 to illustrate the concept of the proposed framework. In the model, synaptic connections  
72 from the presynaptic neuron are distributed on the dendritic tree of the postsynaptic neuron  
73 as observed in experiments (Markram et al., 1997; Feldmeyer et al., 1999). Although a  
74 cortical neuron receives synaptic inputs from several thousands of presynaptic neurons in  
75 reality, here we consider the simplified model to illustrate the conceptual novelty of the  
76 proposed framework. More realistic models will be studied in following sections.

77 The synapses generate different amplitudes of excitatory postsynaptic potentials  
78 at the soma mainly through two mechanisms. First, the amplitude of dendritic attenuation  
79 varies from synapse to synapse, because the distances from the soma are different (Stuart  
80 and Spruston, 1998; Segev and London, 2000). Let us denote this dendritic position  
81 dependence of synapse  $k$  as  $v_k$ , and call it as the unit EPSP, because  $v_k$  corresponds to the  
82 somatic potential caused by a unit conductance change at the synapse (i.e. somatic EPSP per  
83 AMPA receptor). As depicted in Figure 1A, unit EPSP  $v_k$  takes a small (large) value on a  
84 synapse at a distal (proximal) position on the dendrite. The second factor is the amount of  
85 AMPA receptors in the corresponding spine, which is approximately proportional to its spine  
86 size (Matsuzaki et al., 2004). If we denote this spine size factor as  $g_k$ , the somatic EPSP  
87 caused by a synaptic input through synapse  $k$  is written as  $w_k = g_k v_k$ . This means that even if  
88 the synaptic contact is made at a distal dendrite (i.e. even if  $v_k$  is small), if the spine size  $g_k$  is  
89 large, a synaptic input through synapse  $k$  has a strong impact at the soma (e.g. red synapse  
90 in Fig. 1A) or vice versa (e.g. cyan synapse in Fig. 1A).

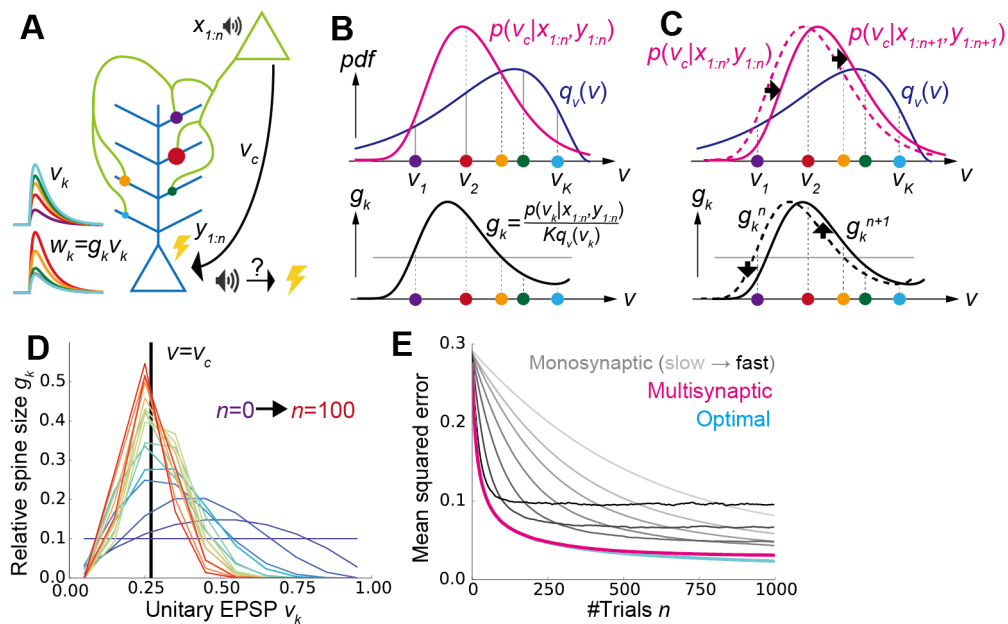

91 **Figure 1. A conceptual model of multisynaptic learning**

92 **A)** Schematic figure of the model consist of two neurons connected with  $K$  synapses. Curves  
 93 on the left represent unit EPSP  $v_k$  (top) and the weighted EPSP  $w_k = g_k v_k$  (bottom) of each  
 94 synaptic connection. Note that synapses are consistently colored throughout Figure 1 and 2.  
 95 **B)** Schematics of non-parametric representation of the probability distribution by  
 96 multisynaptic connections. In both graphs, x-axes are unit EPSP, and the left (right)  
 97 corresponds to distal (proximal) dendrite. The mean over the true distribution  $p(v_c | x_{1:n}, y_{1:n})$   
 98 can be approximately calculated by taking samples (i.e. synapses) from the unit EPSP  
 99 distribution  $q_v(v)$  (top), and then taking a weighted sum over the spine size factor  $g_k$   
 100 representing the ratio  $p(v_c | x_{1:n}, y_{1:n}) / q_v(v)$  (bottom). **C)** Illustration of synaptic weight  
 101 updating. When the distribution  $p(v_c | x_{1:n+1}, y_{1:n+1})$  comes to the right side of the original  
 102 distribution  $p(v_c | x_{1:n}, y_{1:n})$ , a synaptic weight  $g_k^{n+1}$  become larger (smaller) than  $g_k^n$  at  
 103 proximal (distal) synapses. **D)** An example of learning dynamics at  $K=10$  and  $q_v(v) = \text{const}$ .  
 104 Each curve represents the distribution of relative spine size  $\{g_k\}$ , and the colors represent the  
 105 growth of trial number. **E)** Comparison of performance among the proposed method, the  
 106 monosynaptic rule, and the exact solution (see *A conceptual model of multisynaptic*  
 107 *learning* in Methods for details). The monosynaptic learning rule was implemented with  
 108  $\eta = 0.01, 0.015, 0.02, 0.03, 0.05, 0.1, 0.2$  (from gray to black), and the initial value was taken  
 109 as  $v_m^0 = 1/2$ . Lines were calculated by taking average over  $10^4$  independent simulations.

110

111

112

113 On this model, we consider a simplified classical conditioning task as an example,  
114 though the framework is applicable for various inference tasks. Here, the presynaptic  
115 neuron activity represents the conditioned stimulus (CS) such as tone, and the postsynaptic  
116 neuron activity represents the unconditioned stimulus (US) such as shock. CS and US are  
117 represented by binary variables  $x_n \in \{0,1\}$  and  $y_n \in \{0,1\}$ , where  $x_n = 1$  ( $y_n = 1$ ) denotes the  
118 presence of the CS (US), and subscript  $n$  stands for the trial number (Fig. 1A). Learning  
119 behavior of animals and human in such a conditioning can be explained by the Bayesian  
120 framework (Courville et al., 2006). In particular, in order to invoke an appropriate behavioral  
121 response, the brain needs to keep track of the likelihood of US given CS  $v_c \equiv p(y_n = 1 | x_n = 1)$ ,  
122 presumably by changing the synaptic weight between corresponding neurons. Thus, we  
123 consider supervised learning of the conditional probability  $v_c$  by multisynaptic connections,  
124 from pre- and postsynaptic activities representing US and CS, respectively. From finite trials  
125 up to  $n$ , this conditional probability is estimated as  $\bar{v}_c^n = \int v'_c p(v'_c | x_{1:n}, y_{1:n}) dv'_c$ , where  
126  $x_{1:n} = \{x_1, x_2, \dots, x_n\}$  and  $y_{1:n} = \{y_1, y_2, \dots, y_n\}$  are the histories of input and output activities, and  
127  $p(v_c | x_{1:n}, y_{1:n})$  is the probability distribution of the hidden parameter  $v_c$  after  $n$  trials.  
128 Importantly, in general, it is impossible to get the optimal estimation of  $\bar{v}_c^{n+1}$  directly from  
129  $\bar{v}_c^n$ , because in order to calculate  $\bar{v}_c^{n+1} = \int v'_c p(v'_c | x_{1:n+1}, y_{1:n+1}) dv'_c$ , one first needs to calculate the  
130 distribution  $p(v_c | x_{1:n+1}, y_{1:n+1})$  by integrating the previous distribution  $p(v_c | x_{1:n}, y_{1:n})$  and  
131 the new observation at trial  $n+1$ :  $\{x_{n+1}, y_{n+1}\}$ . This means that for near-optimal learning,  
132 synaptic connections need to learn and represent the distribution  $p(v_c | x_{1:n}, y_{1:n})$  instead of  
133 the point estimation  $\bar{v}_c^n$ . But, how can synapses achieve that? The key hypothesis of this  
134 paper is that redundancy in synaptic connections is the substrate for the non-parametric  
135 representation of this probabilistic distribution. Below, we show that dendritic summation  
136 over multisynaptic connections yields the optimal estimation from the given distribution  
137  $p(v_c | x_{1:n}, y_{1:n})$ , and dendritic-position-dependent Hebbian synaptic plasticity updates this  
138 distribution.

139

#### 140 *Dendritic summation as importance sampling*

141 We first consider how dendritic summation achieves the calculation of the mean conditional  
142 probability  $\bar{v}_c^n = \int v'_c p(v'_c | x_{1:n}, y_{1:n}) dv'_c$ . It is generally difficult to evaluate this integral by directly

143 taking samples from the distribution  $p(v_c | x_{1:n}, y_{1:n})$  in a biologically plausible way, because  
 144 the cumulative distribution changes its shape at every trial. Nevertheless, we can still  
 145 estimate the mean value by using an alternative distribution as the proposal distribution,  
 146 and taking weighted samples from it. This method is called importance sampling (Robert  
 147 and Casella, 2013). In particular, here we can use the unit EPSP distribution  $q_v(v)$  as the  
 148 proposal distribution, because unit EPSPs  $\{v_k\}$  of synaptic connections can be interpreted as  
 149 samples depicted from the unit EPSP distribution  $q_v$  (Fig. 1B top). Thus, the mean  $\bar{v}_c^n$  is  
 150 approximately calculated as

$$151 \quad \bar{v}_c^n = \int v'_c p(v'_c | x_{1:n}, y_{1:n}) dv'_c \approx \frac{1}{K} \sum_{k=1}^K \frac{p(v_c = v_k | x_{1:n}, y_{1:n})}{q_v(v_k)} v_k = \sum_k g_k^n v_k = \sum_k w_k^n, \quad (1)$$

152 where  $g_k^n = \frac{p(v_c = v_k | x_{1:n}, y_{1:n})}{K q_v(v_k)}$ . Therefore, if spine size  $g_k^n$  represents the relative weight of  
 153 sample  $v_k$ , then dendritic summation over postsynaptic potentials  $w_k^n \equiv g_k^n v_k$  naturally  
 154 represents the desired value ( $\bar{v}_c^n \approx \sum_k w_k^n$ ). For instance, if the distribution of synapses is  
 155 biased toward proximal side (i.e. if the mean  $\bar{v}_c^n$  is overestimated by the distribution of unit  
 156 EPSPs as in Fig. 1B top), then synapses at distal dendrites should possess large spine sizes,  
 157 while the spine sizes of proximal synapses should be smaller (Fig. 1B bottom).

158

### 159 *Synaptic plasticity as particle filtering*

160 In the previous section, we showed that redundant synaptic connections can represent  
 161 probabilistic distribution  $p(v_c = v_k | x_{1:n}, y_{1:n})$  if spine sizes  $\{g_k\}$  coincide with their importance

162  $g_k^n = \frac{p(v_c = v_k | x_{1:n}, y_{1:n})}{K q_v(v_k)}$ . But, how can synapses update their representation of the probabilistic

163 distribution  $p(v_c = v_k | x_{1:n}, y_{1:n})$  based on a new observation  $\{x_{n+1}, y_{n+1}\}$ ? Because  
 164  $p(v_c = v_k | x_{1:n}, y_{1:n})$  is mapped onto a set of spine sizes  $\{g_k^n\}$  as in Equation 1, the update of the  
 165 estimated distribution  $p(v_k | x_{1:n}, y_{1:n}) \rightarrow p(v_k | x_{1:n+1}, y_{1:n+1})$  can be performed by the update of  
 166 spine sizes  $\{g_k^n\} \rightarrow \{g_k^{n+1}\}$ . By considering particle filtering (Doucet et al., 2000) on the  
 167 parameter space (see *The learning rule for multisynaptic connections* in Methods for details),  
 168 we can derive the learning rule for spine size as

$$169 \quad g_k^{n+1} = \frac{1 + f(x_{n+1}, y_{n+1}; v_k)}{1 + f(x_{n+1}, y_{n+1}; w_k^n)} g_k^n, \quad f(x, y; v) \equiv (2v - 1)x(2y - 1). \quad (2)$$

170 This rule is primary Hebbian, because the weight change depends on the product of pre-  
171 and postsynaptic activity  $x_{n+1}$  and  $y_{n+1}$ . In addition to that, the change also depends on unit  
172 EPSP  $v_k$ . This dependence on unit EPSP reflects the dendritic position dependence of synaptic  
173 plasticity. In particular, for a distal synapse (i.e. for small  $v_k$ ), the position-dependent term  
174  $(2v_k-1)$  takes a negative value (note that  $0 \leq v_k < 1$ ), thus yielding an anti-Hebbian rule as  
175 observed in neocortical synapses (Letzkus et al., 2006; Sjöström and Häusser, 2006).

176 For instance, if the new data  $\{x_{n+1}, y_{n+1}\}$  indicates that the value of  $v_c$  is in fact larger  
177 than previously estimated, then the distribution  $p(v_c | x_{1:n+1}, y_{1:n+1})$  shifts to the right side  
178 (upper panel of Fig. 1C). This means that the spine size  $g_k^{n+1}$  becomes larger than  $g_k^n$  at  
179 synapses on the right side (i.e. proximal side), whereas synapses get smaller on the left side  
180 (i.e. distal side; bottom panel of Fig. 1C). Therefore, pre- and postsynaptic activity causes  
181 LTP at proximal synapses induces LTD at distal synapses as observed in experiments  
182 (Letzkus et al., 2006; Sjöström and Häusser, 2006). The derived learning rule (Eq. 2) also  
183 depends on the total EPSP amplitude  $w^n \equiv \sum_k w_k^n \equiv \sum_k g_k^n v_k$ . This term reflects a normalization  
184 factor possibly modulated through redistribution of synaptic vesicles over the presynaptic  
185 axon (Staras et al., 2010). A surrogate learning rule without this normalization factor will be  
186 studied in a later section.

187 We performed simulations by assuming that the two neurons are connected with  
188 ten synapses with the uniform unit-EPSP distribution (i.e.  $q(v) = \text{const.}$ ). At an initial phase  
189 of learning, the distribution of spine size  $\{g_k^n\}$  has a broad shape (purple lines in Fig. 1D),  
190 and the mean of distribution is far away from the true value ( $v = v_c$ ). However, the distribution  
191 is skewed around the true value as evidence is accumulated through stochastic pre- and  
192 postsynaptic activities (red lines in Fig. 1D). Indeed, the estimation performance of the  
193 proposed method is nearly the same as that of the exact optimal estimation, and much  
194 better than the standard monosynaptic learning rules (Fig. 1E; see *Monosynaptic learning*  
195 *rule* in Methods for details).

196

### 197 *Synaptogenesis as resampling*

198 As shown above, weight modification in multisynaptic connections enables a near optimal  
199 learning. However, to represent the distribution accurately, many synaptic connections are  
200 required (gray line in Fig. 2B), while the number of synapses between a excitatory neuron

201 pair is typically around five in the cortical microcircuits. Moreover, even if many synapses are  
 202 allocated between presynaptic and postsynaptic neurons, if the unit EPSP distribution is  
 203 highly biased, the estimation is poorly performed (gray line in Fig. 2C). We next show that  
 204 this problem can be avoided by introducing synaptogenesis (Holtmaat and Svoboda, 2009)  
 205 into the learning rule.

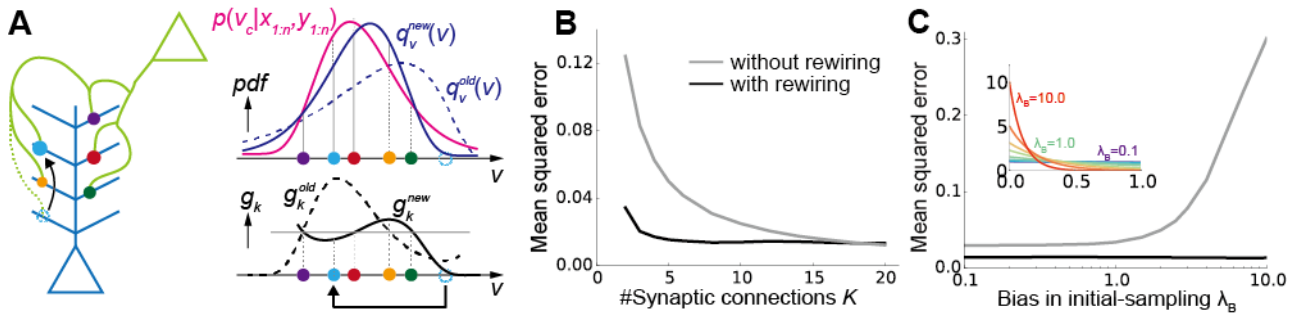

206 **Figure 2. Synaptic rewiring for efficient learning**

207 **A)** Schematic illustration of resampling. Dotted cyan circles represent an eliminated synapse,  
 208 and the filled cyan circles represent a newly created synapse. **B, C)** Comparison of  
 209 performance with/without synaptic rewiring at various synaptic multiplicity  $K$  (**B**), and  
 210 bias in initial-sampling  $\lambda_B$  (**C**). For each bias parameter  $\lambda_B$ , the unit EPSP distribution  $\{v_k\}$  was set  
 211 as  $v_{k'} = -\log\left(1 - \left[1 - e^{-\lambda_B}\right] \frac{k'}{K}\right)$ , as depicted in the inset. Lines are the means over  $10^4$  simulations.

212

213 In the proposed framework, when synaptic connections are fixed (i.e. when  $\{v_k\}$  are  
 214 fixed), some synapses quickly become useless for representing the distribution. For  
 215 instance, in Figure 2A, (dotted) cyan synapse is too proximal to contribute for the  
 216 representation of  $p(v_c|x,y)$ . Therefore, by removing the cyan synapse and creating a new  
 217 synapse at a random site, on average, the representation becomes more effective (Fig. 2A).  
 218 Importantly, in our framework, spine size factor  $g_k$  is proportional to the informativ-  
 219 importance of the synapse by definition, thus optimal rewiring is achievable simply by  
 220 removing the synapse with the smallest spine size. Ideally, the new synapse should be  
 221 sampled from  $p(v_c|x,y)$  for an efficient rewiring, yet it is not clear if such a sampling is  
 222 biologically plausible, and indeed random resampling is sufficient as long as elimination is  
 223 selectively performed as mentioned above.

224 By introducing this resampling process, the model is able to achieve high



225 performance even if the total number of synaptic connection is just around three (black line  
226 in Fig. 2B), or if the initial distribution of  $\{v_k\}$  is poorly taken (black line in Fig. 2C).

227

### 228 *Detailed single neuron model of learning from many presynaptic neurons*

229 In the previous sections, we found that synaptic plasticity in multisynaptic connections can  
230 achieve non-parametric near-optimal learning in a simple model with one presynaptic  
231 neuron. To investigate its biological plausibility, we next extend the proposed framework to  
232 a detailed single neuron model receiving inputs from many presynaptic neurons. To this end,  
233 we constructed an active dendritic model using NEURON simulator (Hines and Carnevale,  
234 1997) based on a previous model of L2/3 pyramidal neurons of the primary visual cortex  
235 (Smith et al., 2013). We randomly distributed 1000 excitatory synaptic inputs from 200  
236 presynaptic neurons on the dendritic tree of the postsynaptic neuron, while fixing synaptic  
237 connections per presynaptic neuron at  $K=5$  (Fig. 3A; see *Morphology* in Methods for the  
238 details of the model). We assumed that all excitatory inputs are made on spines, and each  
239 spine is projected from only one bouton for simplicity. In addition, 200 inhibitory synaptic  
240 inputs were added on the dendrite to keep the excitatory/inhibitory (E/I) balance (Froemke,  
241 2015). We first assigned a small constant conductance for each synapse, and then measured  
242 the somatic potential change, which corresponds to the unit EPSP in the model. As observed  
243 in cortical neurons (Stuart and Spruston, 1998), input at a more distal dendrite showed  
244 larger attenuation at the soma, though variability was quite high across branches (Fig. 3B).

245

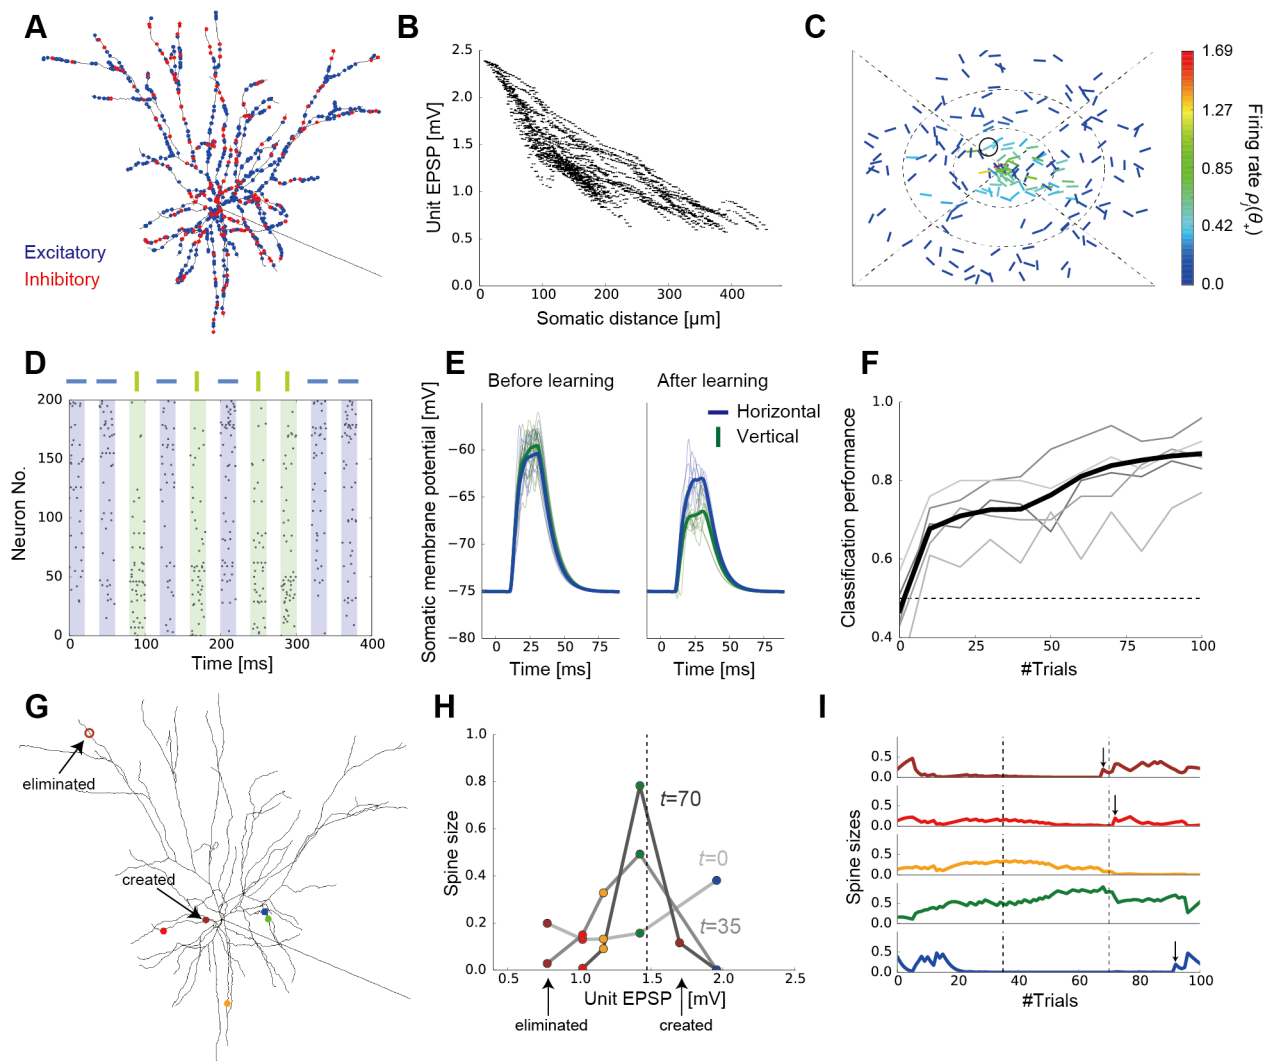

246 **Figure 3. A detailed model of multisynaptic learning with multiple presynaptic neurons**  
 247 **A)** Schematic figure of the detailed neuron model. Blue and red points on the dendritic trees  
 248 represent excitatory and inhibitory synaptic inputs, respectively. **B)** Dendritic position  
 249 dependence of unit EPSP. Each dot represents a synaptic contact on the dendritic tree. **C)** An  
 250 example of the visual selectivity patterns of presynaptic neurons. Position and angle of each  
 251 bar represent the receptive field (RF) and the orientation selectivity of each presynaptic  
 252 neuron, where the RF was defined relative to the RF of the postsynaptic neuron (the central  
 253 position). Colors represent the firing rates of presynaptic neurons when a horizontal bar  
 254 stimulus is presented at the RF of the postsynaptic neuron. Here, the firing rates were  
 255 evaluated as the expected number of spikes within 20ms stimulus duration (see *Stimulus*  
 256 *selectivity* in Methods for details). The black circle shows the selectivity of the representative  
 257 neuron depicted in **G–I**. **D)** Examples of input spike trains generated from the horizontal  
 258 (target) and vertical (non-target) stimuli. Presynaptic neurons were sorted by their stimulus  
 259 preference. Note that in the actual simulations, variables were initialized after each

260 stimulation trial. See *Task configuration* in Methods for details of the task. **E)** Somatic  
261 responses before and after learning. Thick lines represent the average response curves over  
262 100 trials and thin lines are trial-by-trial responses. **F)** The average learning curves over 50  
263 simulations (black line) and examples of learning curves (gray lines). **G–I)** An example of  
264 learning dynamics under the multisynaptic rule (see Results for details).

---

265

266         Next, we consider a perceptual learning task in this neuron model. Each excitatory  
267 presynaptic neuron was assumed to be a local excitatory neuron, modeled as a simple cell  
268 having a small receptive field (RF) and a preferred orientation in the visual space (Fig. 3C).  
269 Axonal projections from each presynaptic neuron were made onto five randomly selected  
270 dendritic branches of the postsynaptic neuron regardless of the stimulus selectivity,  
271 because visual cortex of mice has a rather diverse retinotopic structure (Bonin et al., 2011).  
272 In this setting, the post-neuron should be able to infer the orientation of the stimulus  
273 presented at its RF from the presynaptic inputs, because cells having similar RFs or  
274 orientation selectivity are often co-activated (Simoncelli and Olshausen 2001; Geisler et al.,  
275 2001). Thus, we consider a supervised learning task in which the postsynaptic neuron has to  
276 learn to detect a horizontal grating, not a vertical grating, from stochastic presynaptic  
277 spikes depicted in Figure 3D. In reality, the modulation of lateral connections in L2/3 is  
278 arguably guided by the feedforward inputs from layer 4 (Ko et al., 2013; Urbanczik and Senn  
279 2014). However, for simplicity, we instead introduced an explicit supervised signal to the  
280 postsynaptic neuron. In this formulation, we can directly apply the rule for synaptic plasticity  
281 and rewiring introduced in the previous section (see *The learning rule for the detailed model*  
282 in Methods). Here, in addition to the rewiring by the proposed multisynaptic rule, we  
283 implemented elimination of synapses from uncorrelated presynaptic neurons, to better  
284 replicate developmental synaptic dynamics.

285         Initially, the postsynaptic somatic membrane potential responded similarly to both  
286 horizontal and vertical stimuli, but the neuron gradually learned to show a selective  
287 response to the horizontal stimulus (Fig. 3E). After 100 trials, the two stimuli became easily  
288 distinguishable by the somatic membrane dynamics (Fig. 3E and F; see *Performance*  
289 *evaluation* in Methods for details). Next, we examined how the proposed mechanism works  
290 in detail. To this end, we focused on a presynaptic neuron circled in Figure 3C, and tracked

291 the changes in its synaptic projections and spine sizes (Fig. 3G–I). Because the neuron has a  
292 RF near the postsynaptic RF, and its orientation selectivity is nearly horizontal, the total  
293 synaptic weight from this neuron should be moderately large after learning. Indeed, the  
294 Bayesian optimal weight was estimated to be around 1.5 mV in the model (vertical dotted  
295 line in Fig. 3H), under the assumption of linear dendritic integration. Overall, the unit EPSPs  
296 of the majority of synapses were initially around 1.0–1.5 mV, while smaller or larger unit  
297 EPSPs were rare due to dendritic morphology (Fig. 3B). To counterbalance this bias toward  
298 the center, we initialized the spine size in a U-shape (light gray line in Fig. 3H). In this way,  
299 the prior distribution of the total synaptic weight becomes roughly uniform (see also Fig. 1B).  
300 After a short training, the most proximal spine (the blue one) was depotentiated, whereas  
301 spines with moderate unit EPSP sizes were potentiated (yellow and green ones on dark gray  
302 line in Fig. 3H). This is because, the expected distribution of the weight from this  
303 presynaptic neuron shifted to the left side (i.e. to a smaller EPSP) after the training, and this  
304 shift was implemented by reducing the spine size of the proximal synapse, while increasing  
305 the sizes of others (as in Fig. 1C, but here the change is to the opposite direction). Note that,  
306 the most distal spine (the brown one) was also depressed here, as the expected distribution  
307 got squeezed toward the center. Finally, after a longer training, the expected distribution  
308 became more squeezed, hence all but the green spine were depotentiated (black line in Fig.  
309 3H). Moreover, the most distal synapse was eliminated because its spine size became too  
310 small to make any meaningful contribution to the representation, and a new synapse was  
311 created at a proximal site (open and closed brown circles in Fig. 3G, respectively) as  
312 explained in Figure 2A. This rewiring achieve a more efficient representation of the weight  
313 distribution on average. Indeed, the new brown synapse was potentiated subsequently (top  
314 panel in Fig. 3I). Note that, in this example, red and blue synapses were also rewired shortly  
315 after this moment (vertical arrows above red and blue traces in Fig. 3I).

316

317 *The model reproduces various properties of synaptic organization on the dendrite*

318 While we confirmed that the proposed learning paradigm works well in a realistic  
319 model setting, we further investigated its consistency with experimental results. We first  
320 calculated spine survival ratio for connections from different presynaptic neurons. As

321 suggested from experimental studies (Ko et al., 2013; Iacaruso et al., 2017), more synapses  
 322 survived if the presynaptic neuron had a RF near the postsynaptic RF after learning (Fig. 4A).  
 323 Likewise, synapses having similar orientation selectivity to the postsynaptic neuron showed  
 324 higher survival rates (Fig. 4B) as indicated from previous observations (Ko et al., 2013; Lee et  
 325 al., 2016). However, this orientation dependence was evident only for projections from  
 326 neurons with a RF in the direction of the postsynaptic orientation selectivity (blue line in Fig.  
 327 4C), and the spines projected from neurons with orthogonal RFs remained to have uniform  
 328 selectivity even after learning (green line in Fig. 4C), as reported in a recent experiment  
 329 (Iacaruso et al., 2017). In contrast, both connections from neurons with nearby and faraway  
 330 RFs showed clear orientation dependence, though the dependence was more evident for the  
 331 latter in the model (Fig. 4D). The consistencies with the experimental results (Fig. 4A–D)  
 332 support the legitimacy of our model setting, though they were achieved by the elimination  
 333 of uncorrelated spines, not by the multisynaptic learning rule per se.

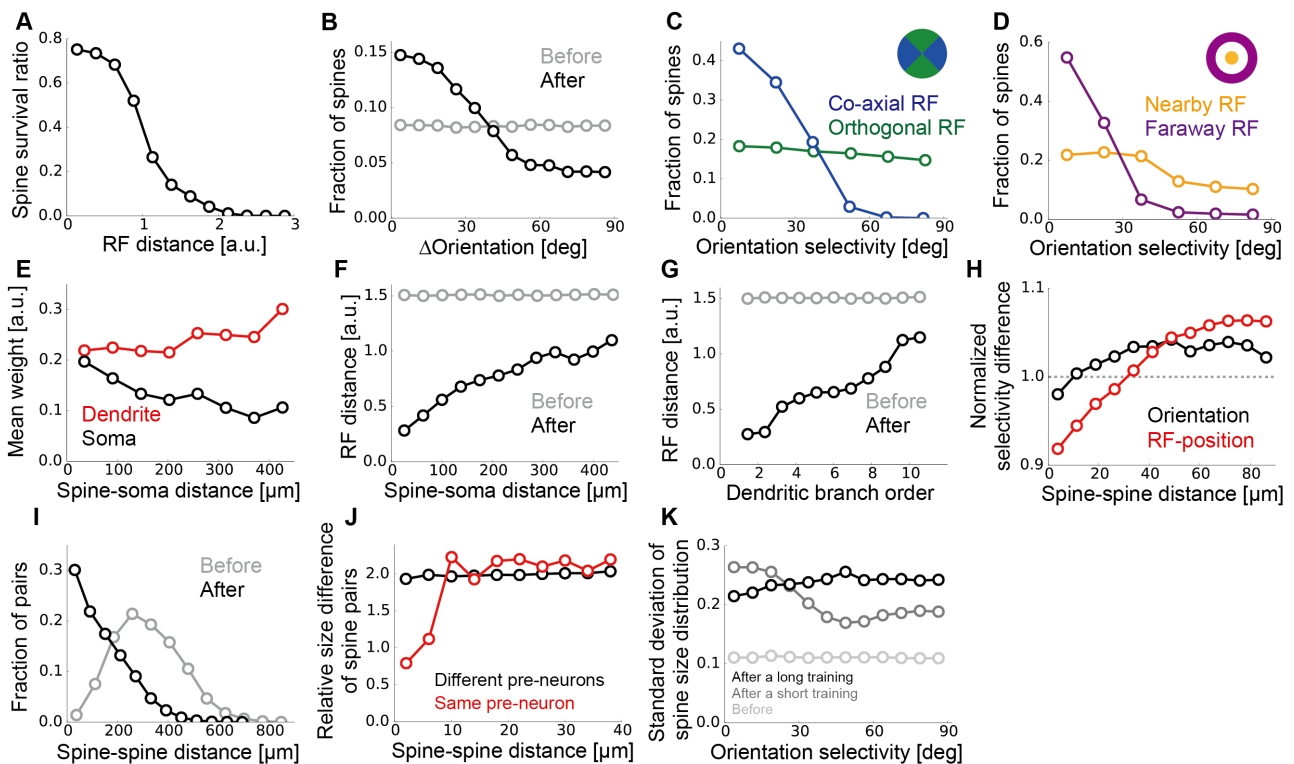

334 **Figure 4. Synaptic organization on the dendrite by the multisynaptic learning rule**  
 335 **A)** Survival ratio of spines with different receptive field (RF) distances from the postsynaptic  
 336 neuron. **B)** Fraction of spines having various orientation selectivity before and after learning.  
 337 **C, D)** Fraction of spines survived after learning, calculated for different orientation  
 338 selectivity at co-axial/orthogonal RFs (**C**), and at nearby/faraway RFs (**D**). We defined the RF

339 of presynaptic neuron  $j$  being orthogonal if  $\frac{\pi}{4} \leq \varphi_j < \frac{3\pi}{4}$  or  $\frac{5\pi}{4} \leq \varphi_j < \frac{7\pi}{4}$ , and co-axial otherwise.  
340 The RF of neuron  $j$  was defined as nearby if  $r_j < 0.5$ , but faraway if  $r_j > 1.0$  (see *Stimulus*  
341 *selectivity* in Methods). **E)** Relationship between the dendritic distance and the relative  
342 weight at the dendrite  $g_k$  and the soma  $g_k v_k / v_{max}$ . **F)** Relationship between the dendritic  
343 distance of a spine and its RF distance in the visual space. **G)** The same as F, but calculated  
344 for the dendritic branch order, not the dendritic distance. **H)** Dependence of normalized RF  
345 difference (red), and normalized orientation difference (black) on the between-spine  
346 distance were calculated for two synapses projected from different neurons. We used the  
347 Euclidean distance in the visual field  $\ell_{ij} = \sqrt{(r_i \cos \varphi_i - r_j \cos \varphi_j)^2 + (r_i \sin \varphi_i - r_j \sin \varphi_j)^2}$  for RF distance  
348 between presynaptic neurons  $i$  and  $j$ , and the normalization was taken over all synapse pairs.  
349 **I)** Distributions of dendritic distance between synapses projected from the same presynaptic  
350 neuron before and after learning. **J)** Relative spine size difference between spines projected  
351 from the same presynaptic neuron or different neurons calculated for pairs with different  
352 spine distance. The relative size difference between spine  $i$  and  $j$  was defined as  $|\log(g_i/g_j)|$ .  
353 **K)** Standard deviation (SD) of spine size distribution at various orientation selectivity for  
354 synapses from presynaptic neurons with nearby RFs ( $r_j < 0.5$ ). The distributions for short and  
355 long training were taken after learning from 10 and 1000 samples, respectively. All panels  
356 were calculated by taking averages over 500 independently simulated neurons, and the  
357 learning was performed from 1000 training samples.

---

358

359 We next investigated changes in dendritic synaptic organization generated by the  
360 multisynaptic learning. Overall, the mean spine size was slightly larger at distal dendrites  
361 (red line in Fig. 4E), but this trend was not strong enough to compensate the dendritic  
362 attenuation (black line in Fig. 4E), being consistent with previous observations in neocortical  
363 pyramidal neurons (Williams and Stuart, 2003). Importantly, neurons with RFs faraway from  
364 the postsynaptic RF likely formed synaptic projections more on distal dendrites than on  
365 proximal ones (Fig. 4F), and at higher dendritic branch orders than at lower ones (Fig. 4G),  
366 as observed previously (Iacaruso et al., 2017). This is because, in the proposed learning rule,  
367 if pre- and postsynaptic neurons have similar spatial selectivity, synaptic connections are  
368 preferably rewired toward proximal positions (Fig. 3G), and vice versa (Fig. 2A). Moreover,  
369 nearby spines on the dendrite showed similar RF selectivity even if multisynaptic pairs (i.e.,  
370 synapse pairs projected from the same neuron) were excluded from the analysis (red line in

371 Fig. 4H), due to the dendritic position dependence of presynaptic RFs. On the other hand,  
372 similarity between nearby spines was less significant in orientation selectivity (black line in  
373 Fig. 4H), as observed previously in rodent experiments (Jia et al., 2010; Iacaruso et al., 2017).  
374 These results suggest a potential importance of developmental plasticity in  
375 somatic–distance dependent synaptic organization.

376 In the model, the position of a newly created synapse was limited to the branches  
377 where the presynaptic neuron initially had a projection, to roughly reproduce the spatial  
378 constraint on synaptic contacts. As a result, although there are many locations on the  
379 dendrite where the unit EPSP size is optimal for a given presynaptic neuron, only few of them  
380 are accessible from the neuron, hence synapses from the same presynaptic neuron may  
381 form clusters there. Indeed, by examining changes in multisynaptic connection structure,  
382 we found that the dendritic distance between two spines projected from the same  
383 presynaptic neuron became much shorter after learning (Fig. 4I), creating clusters of  
384 synapses from the same axon. This result suggests that clustering of multisynaptic  
385 connections observed in the experiments (Schmidt 2017) is possibly caused by  
386 developmental synaptogenesis under a spatial constraint. Furthermore, as observed in  
387 hippocampal neurons (Bartol et al., 2015), two synapses from the same presynaptic neuron  
388 had similar spine sizes if the connections were spatially close to each other, but the  
389 correlation in spine size disappeared if they were distant (red line in Fig. 4J). On the other  
390 hand, spine sizes of two synapses from different neurons were always uncorrelated  
391 regardless of the spine distance (black line in Fig. 4J).

392 Lastly, we studied the spine size distribution. In the proposed framework, the mean  
393 spine size does not essentially depend on presynaptic stimulus selectivity due to  
394 normalization, but the variance may change. In particular, the spine size variance is  
395 expected to be small if the presynaptic activity is highly stochastic, because the distribution  
396 of spine sizes stays nearly uniform in this condition, while the spine size variance should  
397 increase upon accumulation of samples. Indeed, in the initial phase of learning, the variance  
398 of spine size went up for projections from neurons with horizontal orientation selectivity  
399 (gray line Fig. 4K), though the spine size variance from other presynaptic neurons caught up  
400 eventually (black line Fig. 4K). In this regard, a recent experimental study found higher

401 variability in postsynaptic density (PSD) areas for projections from neurons sharing  
 402 orientation preference with the postsynaptic cell, though the data was from adult, not from  
 403 juvenile mice (Lee et al., 2016).

404

405 *The multisynaptic rule robustly enables fast learning*

406 The correspondence with experiment observations discussed in the previous section  
 407 supports the plausibility of our framework as a candidate mechanism of synaptic plasticity  
 408 on the dendrites. Hence, we further studied the robustness of learning dynamics under the  
 409 proposed multisynaptic rule. Below, we turn off the spine elimination mechanism that is not  
 410 compensated by creation, as this process affects the learning dynamics.

411 In the proposed model, if the initial synaptic distribution on the dendrite  $q(\nu)$  is  
 412 close to the desired distribution  $p(\nu)$ , spine size modification is in principle unnecessary. In  
 413 particular, the optimal EPSPs of most presynaptic neurons are small in our L2/3 model (Fig.  
 414 3C); hence most synaptic contacts should be placed on distal branches on average. Indeed,  
 415 when the initial synaptic distribution was biased toward the distal side, improvement in  
 416 classification performance became faster (black vs blue lines in Fig. 5A). This result suggests  
 417 that the synaptic distribution on the postsynaptic dendrite may work as a prior distribution.

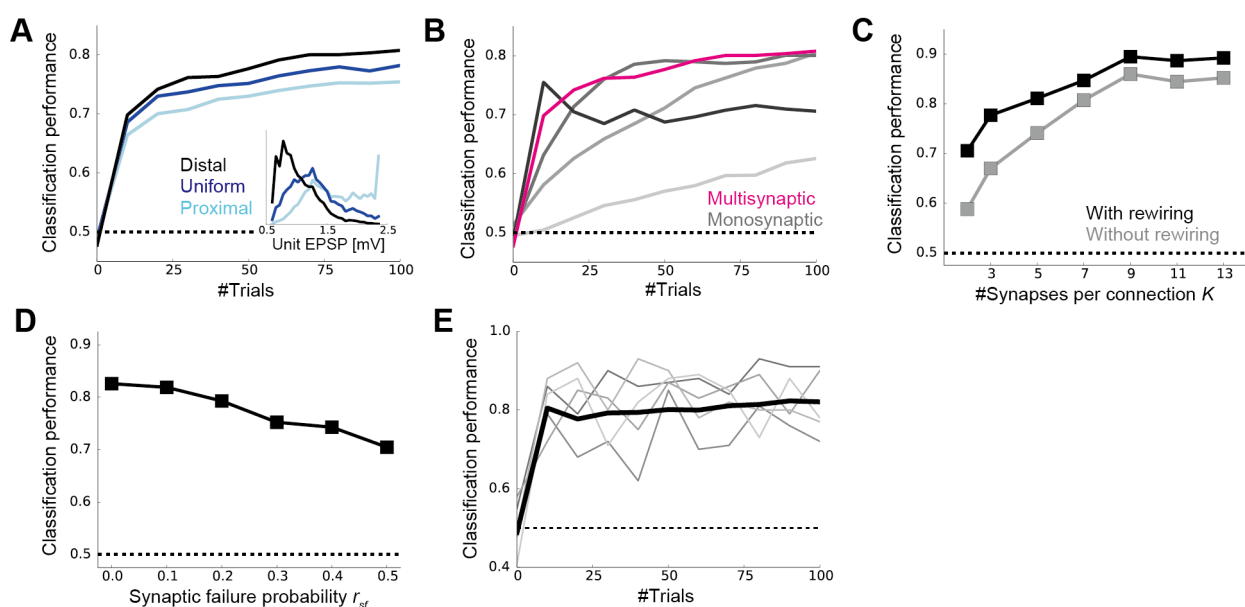

418 **Figure 5. Dynamics of the multisynaptic learning rule under various conditions**

419 **A)** Learning dynamics under various initial synaptic distributions. The inset represents the  
 420 unit EPSP distributions when synaptic connections are biased toward the distal dendrite



421 (black), unbiased (blue), and biased toward the proximal (light blue). **B)** Comparison with the  
422 monosynaptic learning. We set the learning rate as  $\eta_w=0.03, 0.1, 0.3, 1.0$ , from light gray to  
423 black lines. To keep the E/I balance, the inhibitory weight was set to  $\gamma_I=2.0$  for  $\eta_w=1.0$ , and  
424  $\gamma_I=1.25$  for the rest. The magenta line is the same as the black line in **A**. **C)** Classification  
425 performance after learning with different numbers of synapses per connection with or  
426 without rewiring. For the E/I balance, the inhibitory weights were chosen as  $\gamma_I=2.0, 1.2, 0.75,$   
427  $0.6, 0.5, 0.4, 0.3$ , when the number of synapses per connections were  $K=2, 3, 5, 7, 9, 11, 13,$   
428 respectively. **D)** The performance after learning with various synaptic failure probabilities.  
429 Both in panel **C** and **D**, the performance was calculated after 1000 trials. **E)** Learning  
430 dynamics under the surrogate rule. Thin gray lines represent examples. All panels were  
431 calculated by taking the means over 50 simulations.

---

432

433 We next compared the learning performance with the standard monosynaptic  
434 learning rule in which the learning rate is a free parameter (see *Monosynaptic rule for the*  
435 *detailed model* in Methods). If the learning rate is chosen at a small value, the neuron took a  
436 very large number of trials to learn the classification task (light gray line in Fig. 5B). On the  
437 other hand, if the learning rate is too large, the learning dynamics became unstable and the  
438 performance dropped off after a dozen trials (black line in Fig. 5B). Therefore, the learning  
439 performance was comparable with the multisynaptic rule only in a small parameter region  
440 ( $\eta_w \sim 0.1$ ). By contrast, in the multisynaptic rule, stable fast learning was achievable without  
441 any fine-tuning (magenta line in Fig. 5B).

442 As expected from Figure 2, the proposed learning mechanism worked well even if  
443 the number of synapses per connection was small (Fig. 5C). Without rewiring, the  
444 classification task required seven synapses per connection for an 80% success rate, but  
445 three was enough with rewiring (Fig. 5C). Moreover, the learning performance was robust  
446 against synaptic failure (Fig. 5D). Although local excitatory inputs to L2/3 pyramidal cells  
447 have a relatively high release probability (Branco and Staras, 2009), the stochasticity of  
448 synaptic transmission at each synapse may affect learning and classification. We found that  
449 even if the half of presynaptic spikes were omitted at each synapse (see *Task configuration*  
450 in Methods for details), the classification performance was still significantly above the  
451 chance level (Fig. 5D).

452 In the proposed model, competition was assumed among synapses projected from  
453 the same presynaptic neuron, but it is unclear if homeostatic plasticity works in such a  
454 specific manner. Thus, we next constructed a surrogate learning rule that only requires a  
455 global homeostatic plasticity. In this rule, the importance of a synapse was not compared  
456 with other synapses from the same presynaptic neuron, but was compared with a  
457 hypothesized standard synapse (see *The surrogate learning rule* in Methods). When the unit  
458 EPSP size of the standard synapse was chosen appropriately, the surrogate rule indeed  
459 enabled neuron to learn the classification task robustly and quickly (Fig. 5E). Overall, these  
460 results support the robustness and biological plausibility of the proposed multisynaptic  
461 learning rule.

462

## 463 Discussion

464 In this work, first we have used a simple conceptual model to show: (i) Multisynaptic  
465 connections provide a non-parametric representation of probabilistic distribution of the  
466 hidden parameter using redundancy in synaptic connections (Fig. 1AB); (ii) Updating of  
467 probabilistic distribution given new inputs can be performed by a Hebbian-type synaptic  
468 plasticity when the output activity is supervised (Fig. 1C-E); (iii) Elimination and creation of  
469 spines is crucial for efficient representation and fast learning (Fig. 2A-C). In short, synaptic  
470 plasticity and rewiring at multisynaptic connections naturally implements an efficient  
471 sample-based Bayesian filtering algorithm. Secondly, we have demonstrated that the  
472 proposed multisynaptic learning rule works well in a detailed single neuron model receiving  
473 stochastic spikes from many neurons (Fig. 3). Moreover, we found that the model  
474 reproduces the somatic-distance dependent synaptic organization observed in the L2/3 of  
475 rodent visual cortex (Fig. 4F and G). Furthermore, the model suggests that the dendritic  
476 distribution of multisynaptic inputs provides a prior distribution of the expected synaptic  
477 weight (Fig. 5A).

478

### 479 *Experimental predictions*

480 Our study provides several experimentally testable predictions on dendritic synaptic  
481 plasticity, and the resultant synaptic distribution. First, the model suggests a crucial role of

482 developmental synaptogenesis in the formulation of presynaptic selectivity-dependent  
483 synaptic organization on the dendritic tree (Fig. 4F and G), observed in the primary visual  
484 cortex (Iacaruso et al., 2017). More specifically, we have revealed that the RF-dependence of  
485 synaptic organization is a natural consequence of the Bayesian optimal learning under the  
486 given implementation. Evidently, retinotopic organization of presynaptic neurons is partially  
487 responsible for this dendritic projection pattern, as a neuron tends to make a projection  
488 onto a dendritic branch near the presynaptic cell body (Markram et al., 2015; Gal et al.,  
489 2017). However, a recent experiment reported that RF-dependent global synaptic  
490 organization on the dendrite is absent in the primary visual cortex of ferrets (Scholl et al.,  
491 2017). This result indirectly supports the non-anatomical origin of the dendritic synaptic  
492 organization, as a similar organization is arguably expected in ferrets if the synaptic  
493 organization is purely anatomical.

494 Our study also predicts developmental convergence of synaptic connections from  
495 each presynaptic neuron (Fig. 3G and Fig. 4I). It is indeed known that in adult cortex,  
496 synaptic connections from the same presynaptic neuron are often clustered (Kasthuri et al.,  
497 2015; Schmidt, 2017). Our model interprets synaptic clustering as a result of an  
498 experience-dependent resampling process by synaptic rewiring, and predicts that synaptic  
499 connections are less clustered in immature animal. In particular, our result suggests that  
500 synaptic clustering occurs in a relatively large spatial scale ( $\sim 100\mu\text{m}$ ; as shown in Fig 5I), not  
501 in a fine spatial scale ( $\sim 10\mu\text{m}$ ). This may explain a recent report on the lack of fine clustering  
502 structure in the rodent visual cortex (Lee et al., 2016).

503 Furthermore, our study provides an insight on the functional role of anti-Hebbian  
504 plasticity at distal synapses (Letzkus et al., 2006; Sjöström and Häusser, 2006). Even if the  
505 presynaptic activity is not tightly correlated with the postsynaptic activity, that does not  
506 mean the presynaptic input is not important. For instance, in our detailed neuron model,  
507 inputs from neurons having a RF faraway from the postsynaptic RF still helps the  
508 postsynaptic neuron to infer the presented stimulus (Fig. 3). More generally, long-range  
509 inputs are typically not correlated with the output spike trains, because the inputs usually  
510 carry contextual information (Bittner et al., 2015), or delayed feedback signals (Manita et al.,  
511 2015), yet play important modulatory roles. Our study indicates that anti-Hebbian plasticity

512 at distal synapses prevents these connections from being eliminated, by keeping the  
513 synaptic connection strong. This may explain why modulatory inputs are often projected to  
514 distal dendrites (Bittner et al., 2015; Manita et al., 2015), though active dendritic  
515 computation should also be crucial especially in case of Layer 5 or CA1 pyramidal neurons  
516 (Segev and London, 2000).

517

### 518 *Related works*

519 Previous theoretical studies often explain synaptic plasticity as stochastic gradient descent  
520 on some objective functions (Pfister et al., 2006; Nessler et al., 2013; Urbanczik and Senn,  
521 2014; Hiratani and Fukai, 2016), but these models require fine-tuning of the learning rate  
522 for explaining near-optimal learning performance observed in humans (Behrens et al.,  
523 2007; Lake et al., 2015) and rats (Madarasz et al., 2016), unlike our model. Moreover, in this  
524 study, we proposed synaptic dynamics during learning as a sample-based inference process,  
525 in contrast to previous studies in which sample-based interpretations were applied for  
526 neural dynamics (Orbán et al., 2016).

527 On the anti-Hebbian plasticity at distal synapse, previous modeling studies have  
528 revealed its potential phenomenological origins (Graupner and Brunel, 2012), but its  
529 functional benefits, especially optimality, have not been well investigated before. Particle  
530 filtering is an established method in machine learning (Doucet et al., 2000), and has been  
531 applied to artificial neural networks (Freitas et al., 2000), yet its biological correspondence  
532 had been elusive.

533 Previous computational studies on dendritic computation have been emphasizing  
534 the importance of active dendritic process (Segev and London, 2000), especially for  
535 performing inference from correlated inputs (Ujfalussy et al., 2015), or for computation at  
536 terminal tufts of cortical layer 5 or CA1 neurons (Urbanczik and Senn, 2014). Nevertheless,  
537 experimental studies suggest the summation of excitatory inputs through dendritic tree is  
538 approximately linear (Cash and Yuste, 1999; Hao et al., 2009). Indeed, we have shown that a  
539 linear summation of synaptic inputs is suitable for implementing importance sampling.  
540 Moreover, we have demonstrated that even in a detailed neuron model with active dendrites,  
541 a learning rule assuming a linear synaptic summation works well.

542

543 **Methods**

544 ***A conceptual model of multisynaptic learning***

545 ***The learning rule for multisynaptic connections***

546 In the model, CS (eg. tone stimulus) and US (eg. electric shock) were represented by binary  
 547 variables  $x_n \in \{0,1\}$  and  $y_n \in \{0,1\}$ . At each trial  $n$ , CS was delivered with  $\Pr[x_n = 1] = \pi_x$ , and US  
 548 was given only when  $x_n = 1$ , with probability  $\Pr[y_n = 1 | x_n = 1] = v_c$ . For this task, the update rule  
 549 for the spine size factor  $g_k^{n+1} = \frac{1}{Kq_v(v_k)} p(v_c = v_k | x_{1:n+1}, y_{1:n+1})$  is given as,

$$\begin{aligned} g_k^{n+1} &= \frac{1}{Kq_v(v_k)} p(v_c = v_k | x_{1:n+1}, y_{1:n+1}) \\ &\propto \frac{1}{Kq_v(v_k)} p(x_{n+1}, y_{n+1} | v_c = v_k) p(v_c = v_k | x_{1:n}, y_{1:n}) \\ 550 &\propto p(y_{n+1} | x_{n+1}, v_c = v_k) \left( \frac{1}{Kq_v(v_k)} p(v_c = v_k | x_{1:n}, y_{1:n}) \right) \\ &= p(y_{n+1} | x_{n+1}, v_c = v_k) g_k^n. \end{aligned}$$

551 In particular, in our problem setting,  $v_c$  does not provide any information about  $y_n$  when  
 552  $x_n = 0$ , thus approximately (see the proof of convergence below),

$$\begin{aligned} 553 \quad p(y_{n+1} | x_{n+1}, v_c = v_k) &\approx x_{n+1} [v_k y_{n+1} + (1 - v_k)(1 - y_{n+1})] + \frac{1}{2}(1 - x_{n+1}) \\ &\propto 1 + (2v_k - 1)x_{n+1}(2y_{n+1} - 1). \end{aligned}$$

554 Because the normalization factor is determined by

$$555 \quad 1 = \int p(v'_c | x_{1:n}, y_{1:n}) dv'_c \approx \frac{1}{K} \sum_k \frac{p(v'_c = v_k | x_{1:n}, y_{1:n})}{q_v(v_k)} = \sum_k g_k^n,$$

556 the sum of  $\{g_k^{n+1}\}$  should also be normalized to 1. Thus the update rule is given as

$$557 \quad g_k^{n+1} = \frac{[1 + f(x_{n+1}, y_{n+1}; v_k)] g_k^n}{\sum_{k'} [1 + f(x_{n+1}, y_{n+1}; v_{k'})] g_{k'}^n} = \frac{1 + f(x_{n+1}, y_{n+1}; v_k)}{1 + f(x_{n+1}, y_{n+1}; w^n)} g_k^n,$$

558 where  $f(x, y; v) \equiv (2v - 1)x(2y - 1)$  and  $w^n \equiv \sum_k w_k^n = \sum_k g_k^n v_k$ . As for the resampling process, at  
 559 every trial  $n$ , if spine  $k$  satisfied  $g_k < g_{th}$ , unit EPSP was resampled uniformly from  $[0, 1)$ , and  
 560 the spine size was set to  $g_k = g_{th}$ .

561

562 ***Proof of convergence***

563 The derived learning rule can be rewritten as

$$564 \quad \log p(v_c = v_k | x_{1:n}, y_{1:n}) = \sum_{n'} \log [1 + (2v_k - 1)x_{n'}(2y_{n'} - 1)] + \text{const},$$

565 so in order to prove convergence, we need to show that  $\varphi(v) \equiv \langle \log [1 + (2v - 1)x_{n'}(2y_{n'} - 1)] \rangle_{n'}$  is

566 maximized at true  $v_c$ . By considering Taylor expansion, the above equation is expanded as

567  $\langle \log(1+z) \rangle = \sum_{m=1}^{\infty} \frac{(-1)^{m+1}}{m} \langle z^m \rangle$ . In this form, the average is calculated as

568 
$$\begin{aligned} \langle ((2v-1)x_{n'}(2y_{n'}-1))^m \rangle &= (2v-1)^m \langle x_{n'}y_{n'} + (-1)^m x_{n'}(1-y_{n'}) \rangle \\ &= (2v-1)^m v_c \pi_x + (1-2v)^m (1-v_c) \pi_x \end{aligned}$$

569 Note that  $(x_n)^m = x_n$  if  $m > 0$ , because  $x_n = 0$  or  $1$ . Thus, by substituting the above equation into  
570 the Taylor expansion form,

571 
$$\begin{aligned} \varphi(v) &= \pi_x v_c \log[1+(2v-1)] + \pi_x (1-v_c) \log[1+(1-2v)] \\ &= \pi_x [v_c \log v + (1-v_c) \log(1-v)] + \text{const.} \end{aligned}$$

572 Therefore,  $\varphi(v)$  is maximized at  $v = v_c$ .

573

### 574 Monosynaptic learning rule

575 For comparison, we implemented a monosynaptic learning rule. By expanding the  
576 exact solution  $\bar{v}_c^n = \sum_{n'} x_{n'} y_{n'} / \sum_{n'} x_{n'}$ :

577 
$$\bar{v}_c^n = (x_n y_n + \sum_{n'=1}^{n-1} x_{n'} y_{n'}) / (x_n + \sum_{n'=1}^{n-1} x_{n'}) \approx \bar{v}_c^{n-1} (1 + x_n (y_n - \bar{v}_c^{n-1}) / \sum_{n'=1}^{n-1} x_{n'} y_{n'}).$$

578 Hence, by using a single variable  $v_m^n$ , the learning rule is given as  $v_m^n = v_m^{n-1} (1 + \eta x_n (y_n - \bar{v}_m^{n-1}))$ ,

579 where  $\eta$  represents the learning rate. In the optimal learning depicted in Figure 1E,  $v_c$  was

580 estimated as  $\bar{v}_c^n = (1 + \sum_{n'} x_{n'} y_{n'}) / (2 + \sum_{n'} x_{n'})$ .

581

### 582 Details of the conceptual model

583 In the simulations, we used  $\pi_x = 0.3$ , and  $v_c$  was randomly chosen from  $[0,1]$   
584 uniformly at each simulation (not at each trial). The number of connections was kept at  
585  $K=10$  except for Figure 2B in which  $K=2$  to  $20$  were used. Initial value of  $k$ -th connection  $v_k$   
586 was set as  $v_k = (k+0.5)/K$  except for Figure 2C in which the initial distribution was biased by  
587 choosing  $v_k$  as  $v_{k'} = -\log(1 - [1 - e^{-\lambda_B}]^{k'/K})$  where  $\lambda_B$  is the bias parameter. Resampling was  
588 performed with the threshold  $g_{th} = 0.0001$ , and a new unit EPSP  $v_k$  was uniformly sampled  
589 from  $[0,1]$ . In Figure 2B and C, the errors were calculated after learning from  $10^4$  trials.

590

## 591 ***Detailed single neuron model***

### 592 *Morphology*

593 We constructed a detailed neuron model based on a model of L2/3 pyramidal neuron with  
594 active dendrites (Smith et al., 2013) using NEURON simulator (Hines and Carnevale, 1997).  
595 Here, we used the original reconstructed morphology without scaling. We distributed 1000  
596 excitatory synaptic inputs from 200 presynaptic neurons randomly on the dendrite. Synaptic  
597 input was modeled as a double exponential conductance change with the rise time  
598  $\tau_{rise}=0.5\text{ms}$ , the decay time  $\tau_{decay}=2.5\text{ms}$ , and the reversal potential was set to 0mV. For each  
599 synapse  $k$  from presynaptic neuron  $j$ , we first applied a synaptic input with a constant weight  
600 factor  $\gamma_g=2.5\text{nS}$ , and then determined the unit EPSP  $v_j^k$  of synapse  $k$  by measuring somatic  
601 membrane potential change. The minimum and the maximum value of the unit EPSP of the  
602 given model were  $v_{min}=0.57\text{mV}$  and  $v_{max}=2.39\text{mV}$ , respectively. In the simulation of the task,  
603 using malleable spine size factor  $g_j^k$ , we set the weight factor of synapse  $k$  as  $\gamma_g g_j^k$ . Similarly,  
604 200 inhibitory synaptic inputs were uniformly distributed on the dendrite, and the rise and  
605 decay time of conductance was set as 0.5ms and 2.5ms, and the reversal potential was set to  
606  $-90\text{mV}$ . The inhibitory weight factor was chosen as  $\gamma_i=0.75\text{nS}$ .

607

### 608 *Stimulus Selectivity*

609 We hypothesized that all excitatory presynaptic neurons are simple cells having direction  
610 selectivity  $\{\theta_j\}$  at receptive field (RF)  $\{(r_j, \varphi_j)\}$ . Here, the position of RF in the visual field was  
611 defined by the relative position to the postsynaptic neuron in the polar coordinate (Fig. 3C).  
612 We modeled the mean firing rate of presynaptic neuron  $j$  for a stimulus  $\theta$  at the RF of the  
613 postsynaptic neuron (i.e. at  $r=0$ ) as

$$614 \quad \rho_j(\theta) = \int_0^{2\pi} \rho(\theta'; \theta_j) \cdot p(\theta' \text{ at } \{r_j, \varphi_j\} | \theta \text{ at } r=0) d\theta' .$$

615 The first term  $\rho(\theta'; \theta_j)$  is the mean response of the neuron with orientation selectivity  $\theta_j$   
616 when orientation  $\theta'$  is presented at its own RF, hence using a von Mises distribution, the  
617 response is approximately given as  $\rho(\theta'; \theta_j) \equiv \rho_o \exp(\kappa_o \cos[2(\theta' - \theta_j)]) / (2\pi I_o(\kappa_o))$  (Swindale,  
618 1998). The second term is the probability of observing a stimulus with orientation  $\theta'$  at the  
619 position  $(r_j, \varphi_j)$  given stimulus  $\theta$  at the center. The orientation  $\theta'$  at  $(r_j, \varphi_j)$  should be similar

620 to the orientation  $\theta$  at the center if  $r_j \sim 0$ , or  $\varphi_j \sim \theta$  due to continuity and contour statistics  
 621 (Simoncelli and Olshausen 2001; Geisler et al., 2001). Hence, we modeled the conditional  
 622 probability as

$$623 \quad \rho(\theta' \text{ at } \{r_j, \varphi_j\} | \theta \text{ at } r=0) \equiv \exp(-r_j/r_o + \kappa_j^r \cos[2(\theta' - \theta)]) / (2\pi I_o(\kappa_j^r))$$

624 where  $\kappa_j^r(\theta) \equiv \frac{r_o}{r_j + r_{min}} \exp(\kappa_\varphi \cos[2(\varphi_j - \theta)])$ . Note that the marginalized probability  $\exp(-r_j/r_o)$  is  
 625 smaller than one as an explicit stimulus may not exist at  $(r_j, \varphi_j)$  if the RF is far away from the  
 626 center. By calculating the integral, the mean firing rate is derived as

$$627 \quad \rho_j(\theta) = (\rho_o I_o(\tilde{\kappa}_j) / [2\pi I_o(\kappa_o) I_o(\kappa_j^r)]) e^{-r_j/r_o} \quad \text{where} \quad \tilde{\kappa}_j \equiv \sqrt{(\kappa_o)^2 + (\kappa_j^r)^2 + 2\kappa_o \kappa_j^r \cos(2[\theta_j - \theta_o])}. \quad \text{In the}$$

628 simulation, we used  $\kappa_o=2.0$ ,  $\kappa_\varphi=4.0$ ,  $\rho_o=1.5\pi$ ,  $r_{min}=0.01\exp(\kappa_\varphi)$ , and  $r_o=1.0$ . The selectivity  
 629 of each presynaptic neuron was uniformly sampled from the ranges:  $0 \leq r_j < 3$ ,  $0 \leq \varphi_j < 2\pi$ , and  
 630  $0 \leq \theta_j < \pi$ .

631 Based on the selectivity described above, we modeled the spiking activity of  
 632 presynaptic neuron  $j$  as a Poisson process with the rate  $\rho = \rho_j(\theta)$  under the presence of  
 633 stimulus  $\theta = \theta_+$  or  $\theta_-$ . In addition, we assumed that all presynaptic neurons follow a Poisson  
 634 process with the rate  $\rho = \rho_{sp}$  in the spontaneous activity. In the simulation, we set  $\rho_{sp} = 0.01\rho_o$ .

635

### 636 Task configuration

637 We next consider the activity of the postsynaptic neuron. A sensory neuron should decode  
 638 the presented stimulus given stochastic spiking spikes of presynaptic neurons. In particular,  
 639 here we consider decoding of stimulus orientation  $\theta$  given spike counts from  $M$  presynaptic  
 640 neurons  $s_{1:M}^t = \{s_1^t, s_2^t, \dots, s_M^t\}$ . As the spikes were generated from Poisson processes in the  
 641 model, the log-likelihood ratio of  $\theta = \theta_+$  against the spontaneous activity  $\phi$  is given as

$$642 \quad \log \frac{\rho(\theta_+ | s_{1:M}^t)}{\rho(\phi | s_{1:M}^t)} = \sum_{j=1}^M s_j^t \log \left( \frac{\rho_j(\theta_+)}{\rho_{sp}} \right) + \sum_{j=1}^M (\rho_{sp} - \rho_j(\theta_+)) = \sum_{j=1}^M w_j^* s_j^t + C.,$$

643 where  $w_j^* \equiv \log(\rho_j(\theta_+)/\rho_{sp})$ . Hence, if the synapses projected from presynaptic neuron  $j$  learn to  
 644 represent  $w_j^*$  jointly, the somatic membrane potential naturally represents the  
 645 log-likelihood of the stimulus being  $\theta_+$ , assuming passive dendritic integration.

646 In this task configuration, the estimated log-likelihoods are on average the same  
 647 for two perpendicular stimuli  $\theta = \theta_+$  and  $\theta_-$  before learning, but the estimated log-likelihood



648 becomes significantly larger for  $\theta = \theta_+$  once the correct weight structure is acquired. Hence,  
 649 we evaluated the learning performance by a classification between  $\theta = \theta_+$  and  $\theta_-$ , using  $\theta_-$  as  
 650 a control.

651 In the simulation, we first generated the spike counts of each presynaptic neurons  
 652  $\{s_1^t, s_2^t, \dots, s_M^t\}$  by sampling from Poisson distributions with the rates  $\{\rho_1, \rho_2, \dots, \rho_M\}$  where  
 653  $\rho_j = \rho_j(\theta_+)$  or  $\rho_j(\theta_-)$  depending on the task. Based on the spike count  $s_j^t$ , spike timings of the  
 654  $m$ -th spike from presynaptic neuron  $j$  at trial  $t$  was determined as  $t_m^{j,t} = (\zeta_U^{j,t} + m - 1)\Delta t_{stimulus} / s_j^t$   
 655 where  $\Delta t_{stimulus} = 20\text{ms}$ , and  $\zeta_U^{j,t}$  is a random variable uniformly depicted from  $[0,1)$ . In the  
 656 presence of synaptic failure, we instead defined a spike count at each synapse  $k$  by  $s_{jk}^t \sim$   
 657 Binomial( $s_j^t, 1 - r_{sf}$ ), where  $r_{sf}$  is the failure rate. Inhibitory spikes were calculated in the same  
 658 way, but the spike probability was defined by the total excitatory inputs as  $\rho_{inh}^t = \sum_j^M s_j^t / M_{inh}$   
 659 to achieve the E/I balance.

660

### 661 The learning rule for the detailed model

662 We next derived the multisynaptic learning rule for this task. The optimal estimation of the  
 663 weight from presynaptic neuron  $j$  at trial  $t$  is given as

$$664 \quad w_j^t = \int_{w_{min}}^{w_{max}} w' \cdot p(w_j^t = w' | s_j^{1:t}, \theta_{1:t}) dw' = \int_{v_{min}}^{v_{max}} \gamma_w v' \cdot p(w_j^t = \gamma_w v' | s_j^{1:t}, \theta_{1:t}) dv'.$$

665 Here, we introduced a scaling factor  $\gamma_w$  to represent a dimensionless value  $w$  by a unit EPSP  $v$   
 666 [mV]. In the simulation, we used  $\gamma_w = w_{max} / v_{max}$ . By importance sampling,

$$667 \quad w_j^t = \int_{v_{min}}^{v_{max}} \gamma_w v' \frac{p(w_j^t = \gamma_w v' | s_j^{1:t}, \theta_{1:t})}{q(v')} q(v') dv' \approx \frac{1}{K} \sum_{k=1}^K \frac{\gamma_w v_{jk} p(w_j^t = \gamma_w v_{jk} | s_j^{1:t}, \theta_{1:t})}{q(v_{jk})} = \gamma_w \sum_{k=1}^K g_{jk}^t v_{jk},$$

668 where  $g_{jk}^t \equiv p(w_j^t = \gamma_w v_{jk} | s_j^{1:t}, \theta_{1:t}) / (K q(v_{jk}))$  represents the relative spine size of spine  $k$  from  
 669 presynaptic neuron  $j$ , and  $K$  is the total number of synapses per presynaptic neuron.  
 670 Therefore, considering a Bayesian filtering, the update of  $\{w_j^t\}$  is done by the following  
 671 update of spine size  $\{g_{jk}^t\}$ :

$$672 \quad \tilde{g}_{jk}^t = g_{jk}^t \cdot p(s_j^t | \theta_t, w_j = \gamma_w v_{jk}), \quad \tilde{g}_{jk}^{t+1} = \tilde{g}_{jk}^t / \sum_{k'} \tilde{g}_{jk'}^t,$$

673 where  $p(s_j^t | \theta_t, w_j = \gamma_w v_{jk}) = \delta(\theta_t = \theta_+) \cdot \exp([\gamma_w v_{jk} + \log \rho_{sp}] s_j^t - \rho_{sp} e^{\gamma_w v_{jk}}) / (s_j^t!)$ , and  $\delta(x)$  is a function

674 that returns 1 if  $x$  is true, but returns 0 otherwise.

675 At every trial, synapses with spine size  $g_{jk}^t < g_{th}$  was removed with 20% chance. If a  
 676 synapse is removed, a new synaptic contact from the corresponding presynaptic neuron was  
 677 simultaneously created on one of the dendritic branches to which the neuron initially had  
 678 projections. Probability of selecting a branch was set to be proportional to the length of the  
 679 branch. Spine size of a newly created synapse was set to  $g_{jk}^t = 1/K$ . This rewiring procedure is  
 680 slightly different from the one in the conceptual model, because rewiring becomes too  
 681 frequent if we directly apply the latter.

682 In addition to rewiring of synaptic connections, we also included an elimination  
 683 process that is not compensated by new connections, as the total number of synaptic  
 684 connections is known to decrease during development (Holtmaat and Svoboda, 2009). In  
 685 particular, inactive synapses are expected to be more fragile (Wiegert and Oertner, 2013).  
 686 Hence, we tracked the firing rate of presynaptic neuron during the training phase by  
 687  $r_j^t = (1 - 1/\tau_r)r_j^{t-1} + s_j^t/\tau_r$ . At every trial, if the presynaptic firing rate satisfies  $r_j^t < r_{el-th}$ , we  
 688 eliminated the synaptic contact with 20% chance. Throughout the simulation, we used  $g_{th} =$   
 689 0.001,  $\tau_r = 10.0$ , and  $r_{el-th} = 0.05$ .

690

### 691 Monosynaptic learning rule for the detailed model

692 As presynaptic neurons follow stationary Poisson processes, the learning rule for  
 693 monosynaptic connection was defined as

$$694 \quad g_j^t = g_j^{t-1} + \eta_w (s_j^t \exp[-2\gamma_w v_j] - \rho_{sp}),$$

695 where  $\eta_w$  is the learning rate parameter (Nessler et al., 2013; Hiratani and Fukai, 2016), and  
 696  $v_j$  is the unit EPSP of the synaptic connection from neuron  $j$ . To ensure stability, we bounded  
 697 the spine size between  $0 < g_j^t < 1$ , and doubled the scaling factor from  $\gamma_w$  to  $2\gamma_w$ .

698

### 699 The surrogate learning rule

700 In the surrogate rule, each synapse estimates the mean unit EPSP by  $v_{jk}^o = (1 - g_{jk}^t)v_o + g_{jk}^t v_{jk}$ ,  
 701 where  $v_o$  is the standard unit EPSP. Subsequently, a synapse updates its spine size by

$$702 \quad g_{jk}^{t+1} = g_{jk}^t \exp(s_j^t \log[\rho_{jk}/\rho_{jk}^{ot}] - [\rho_{jk} - \rho_{jk}^{ot}]) / Z_t$$

703 where  $\rho_{jk} = \rho_{sp} \exp(\gamma_w v_{jk})$ ,  $\rho_{jk}^{ot} = \rho_{sp} \exp(\gamma_w v_{jk}^{ot})$ , and  $Z_t = \exp\left[\frac{1}{M \cdot K} \sum_{j,k} (s_j^t \log[\rho_{jk} / \rho_{jk}^{ot}] - [\rho_{jk} - \rho_{jk}^{ot}])\right]$ .

704 The normalization term  $Z_t$  is global in a sense that the term is given by the summation over  
 705 all the excitatory synapses projected to the postsynaptic neuron. To ensure the stability, we  
 706 bounded the spine size factor as  $0 \leq g_{jk}^t \leq 1/2$ , and set  $v_o = 1.5 v_{min}$  ( $\approx 0.9$  mV).

707

### 708 Performance evaluation

709 During the training phase, only the target (i.e. horizontal stimulus  $\theta = \theta_+$ ) was presented. In  
 710 the test phase, we presented 200 stimuli, of which 100 stimuli were the horizontal stimulus  
 711 ( $\theta = \theta_+$ ), while the other half were the vertical stimulus ( $\theta = \theta_-$ ). In Figure 3F, 5A, 5B and 5E, we  
 712 stopped the training at every 10 trials, and measured the performance. The classification  
 713 performance was measured by the ratio of horizontal trials in which the maximum EPSP  
 714 height  $\Delta v_n^h$  exceeded the threshold  $v_\theta = (m_h / \sigma_h^2 + m_v / \sigma_v^2) / (1 / \sigma_h^2 + 1 / \sigma_v^2)$ , to the total of 100 trials,  
 715 where  $m_h = E[\Delta v_n^h]$  and  $\sigma_h^2 = \text{Var}[\Delta v_n^h]$  were calculated over 100 test stimuli ( $n = 1, 2, \dots, 100$ ).  
 716 Although the evaluations were made solely on false negatives, we also observed significant  
 717 decrease of false positives during learning (Fig. 3E). When a postsynaptic action potential  
 718 was emitted, we used the estimated membrane threshold  $\Delta v_{th} = 25$  mV as the maximum EPSP  
 719 height  $\Delta v_n$ , but such a trial was rare ( $< 1\%$ ) in our model setting.

720

### 721 Details of the NEURON simulations

722 Initial values of spine sizes  $\{g_j^k\}$  were chosen such that  $g_j^k \sim 1 / q_v(v_j^k)$  is satisfied. To  
 723 this end, we first estimated the unit EPSP density at  $v = v_j^k$  through a sample-based  
 724 approximation:

$$725 \quad q_v(v_j^k) \propto \sum_{m=1}^M \sum_{i=1}^K \delta[v_j^k - \frac{1}{2} dv \leq v_m^i < v_j^k + \frac{1}{2} dv] \equiv \tilde{q}_v(v_j^k),$$

726 where  $dv = (v_{max} - v_{min}) / 10$ . Then we calculated  $g_j^k$  by  $g_j^k = \frac{1 / \tilde{q}_v(v_j^k)}{\sum_{k'} 1 / \tilde{q}_v(v_j^{k'})}$ . In Figure 5A, to

727 generate a biased synaptic distribution, we randomly sampled a position from the whole

728 dendritic tree with probability  $\left(\frac{L'}{L_{max}}\right)^{\lambda_B - 1} \cdot \left(\frac{L'}{L_{max}}\right)^{1 - \lambda_B} / 10 \cdot B(\lambda_B, 2 - \lambda_B)$ , and added a synapse until 1000

729 synapses are created on the dendritic tree. Here,  $L'$  is the distance from the soma,  $L_{max}$  is its

730 maximum length,  $\lambda_B$  is the bias parameter, and  $B(x,y)$  is the Beta function.

731 Presynaptic selectivity and initial synaptic contacts were randomly generated for  
732 each simulation, while the dendritic morphology was fixed. Further details of the model are  
733 available at ModelDB (<http://modeldb.yale.edu/225075> with access code "1234").

734

### 735 **Acknowledgements**

736 The authors thank to Peter Latham for discussions and comments on the manuscript. This  
737 work was partly supported by CREST, JST (JPMJCR13W1 to TF) and Grants-in-Aid for  
738 Scientific Research (KAKENHI) from MEXT (no 15H04265 and 16H01289 to TF).

739

### 740 **Competing Interests**

741 The authors declare that no competing interests exist.

742

### 743 **References**

- 744 Aitchison, L., and Latham, P.E. (2014). Bayesian synaptic plasticity makes predictions about  
745 plasticity experiments in vivo. ArXiv14101029 Q-Bio.
- 746 Amari, S., Park, H., and Ozeki, T. (2006). Singularities Affect Dynamics of Learning in  
747 Neuromanifolds. *Neural Comput.* *18*, 1007–1065.
- 748 Bartol, T.M., Bromer, C., Kinney, J.P., Chirillo, M.A., Bourne, J.N., Harris, K.M., and  
749 Sejnowski, T.J. (2015). Nanoconnectomic upper bound on the variability of synaptic  
750 plasticity. *eLife* e10778.
- 751 Behrens, T.E.J., Woolrich, M.W., Walton, M.E., and Rushworth, M.F.S. (2007). Learning the  
752 value of information in an uncertain world. *Nat. Neurosci.* *10*, 1214–1221.
- 753 Bittner, K.C., Grienberger, C., Vaidya, S.P., Milstein, A.D., Macklin, J.J., Suh, J., Tonegawa, S.,  
754 and Magee, J.C. (2015). Conjunctive input processing drives feature selectivity in  
755 hippocampal CA1 neurons. *Nat. Neurosci.* *18*, 1133–1142.
- 756 Bonin, V., Histed, M.H., Yurgenson, S., and Reid, R.C. (2011). Local Diversity and Fine-Scale  
757 Organization of Receptive Fields in Mouse Visual Cortex. *J. Neurosci.* *31*, 18506–18521.
- 758 Branco, T., and Staras, K. (2009). The probability of neurotransmitter release: variability  
759 and feedback control at single synapses. *Nat. Rev. Neurosci.* *10*, nrn2634.

- 760 Cash, S., and Yuste, R. (1999). Linear Summation of Excitatory Inputs by CA1 Pyramidal  
761 Neurons. *Neuron* 22, 383–394.
- 762 Courville, A.C., Daw, N.D., and Touretzky, D.S. (2006). Bayesian theories of conditioning in  
763 a changing world. *Trends Cogn. Sci.* 10, 294–300.
- 764 Deuchars, J., West, D.C., and Thomson, A.M. (1994). Relationships between morphology  
765 and physiology of pyramid–pyramid single axon connections in rat neocortex in vitro. *J.*  
766 *Physiol.* 478, 423–435.
- 767 Doucet, A., Godsill, S., and Andrieu, C. (2000). On sequential Monte Carlo sampling  
768 methods for Bayesian filtering. *Stat. Comput.* 10, 197–208.
- 769 Feldmeyer, D., Egger, V., Lübke, J., and Sakmann, B. (1999). Reliable synaptic connections  
770 between pairs of excitatory layer 4 neurones within a single “barrel” of developing rat  
771 somatosensory cortex. *J. Physiol.* 521, 169–190.
- 772 Freitas, J.F.G. de, Niranjana, M., Gee, A.H., and Doucet, A. (2000). Sequential Monte Carlo  
773 Methods to Train Neural Network Models. *Neural Comput.* 12, 955–993.
- 774 Froemke, R.C. (2015). Plasticity of Cortical Excitatory–Inhibitory Balance. *Annu. Rev.*  
775 *Neurosci.* 38, 195–219.
- 776 Gal, E., London, M., Globerson, A., Ramaswamy, S., Reimann, M.W., Muller, E., Markram, H.,  
777 and Segev, I. (2017). Rich cell–type–specific network topology in neocortical  
778 microcircuitry. *Nat. Neurosci.* 20, 1004–1013.
- 779 Geisler, W.S., Perry, J.S., Super, B.J., and Gallogly, D.P. (2001). Edge co–occurrence in  
780 natural images predicts contour grouping performance. *Vision Res.* 41, 711–724.
- 781 Graupner, M., and Brunel, N. (2012). Calcium–based plasticity model explains sensitivity of  
782 synaptic changes to spike pattern, rate, and dendritic location. *Proc. Natl. Acad. Sci.* 109,  
783 3991–3996.
- 784 Gütig, R. (2016). Spiking neurons can discover predictive features by aggregate–label  
785 learning. *Science* 351, aab4113.
- 786 Hao, J., Wang, X., Dan, Y., Poo, M., and Zhang, X. (2009). An arithmetic rule for spatial  
787 summation of excitatory and inhibitory inputs in pyramidal neurons. *Proc. Natl. Acad. Sci.*  
788 106, 21906–21911.
- 789 Hines, M.L., and Carnevale, N.T. (1997). The NEURON Simulation Environment. *Neural*

- 790 Comput. 9, 1179–1209.
- 791 Hiratani, N., and Fukai, T. (2016). Hebbian Wiring Plasticity Generates Efficient Network  
792 Structures for Robust Inference with Synaptic Weight Plasticity. *Front. Neural Circuits* 10,  
793 41.
- 794 Holtmaat, A., and Svoboda, K. (2009). Experience-dependent structural synaptic plasticity  
795 in the mammalian brain. *Nat. Rev. Neurosci.* 10, 647–658.
- 796 Iacaruso, M.F., Gasler, I.T., and Hofer, S.B. (2017). Synaptic organization of visual space in  
797 primary visual cortex. *Nature* 547, 449–452.
- 798 Jia, H., Rochefort, N.L., Chen, X., and Konnerth, A. (2010). Dendritic organization of  
799 sensory input to cortical neurons in vivo. *Nature* 464, 1307–1312.
- 800 Kasthuri, N., Hayworth, K.J., Berger, D.R., Schalek, R.L., Conchello, et al., 2015. Saturated  
801 Reconstruction of a Volume of Neocortex. *Cell* 162, 648–661.  
802 doi:10.1016/j.cell.2015.06.054
- 803 Knill, D.C., and Pouget, A. (2004). The Bayesian brain: the role of uncertainty in neural  
804 coding and computation. *Trends Neurosci.* 27, 712–719.
- 805 Ko, H., Cossell, L., Baragli, C., Antolik, J., Clopath, C., Hofer, S.B., and Mrsic-Flogel, T.D.  
806 (2013). The emergence of functional microcircuits in visual cortex. *Nature* 496, 96–100.
- 807 Körding, K.P., and Wolpert, D.M. (2006). Bayesian decision theory in sensorimotor control.  
808 *Trends Cogn. Sci.* 10, 319–326.
- 809 Lake, B.M., Salakhutdinov, R., and Tenenbaum, J.B. (2015). Human-level concept learning  
810 through probabilistic program induction. *Science* 350, 1332–1338.
- 811 Lee, W.-C.A., Bonin, V., Reed, M., Graham, B.J., Hood, G., Glattfelder, K., and Reid, R.C.  
812 (2016). Anatomy and function of an excitatory network in the visual cortex. *Nature* 532,  
813 370–374.
- 814 Letzkus, J.J., Kampa, B.M., and Stuart, G.J. (2006). Learning Rules for Spike  
815 Timing-Dependent Plasticity Depend on Dendritic Synapse Location. *J. Neurosci.* 26,  
816 10420–10429.
- 817 Madarasz, T.J., Diaz-Mataix, L., Akhand, O., Ycu, E.A., LeDoux, J.E., and Johansen, J.P.  
818 (2016). Evaluation of ambiguous associations in the amygdala by learning the structure  
819 of the environment. *Nat. Neurosci.* 19, 965–972.

- 820 Manita, S., Suzuki, T., Homma, C., Matsumoto, T., Odagawa, M., Yamada, K., Ota, K.,  
821 Matsubara, C., Inutsuka, A., Sato, M., et al. (2015). A Top-Down Cortical Circuit for  
822 Accurate Sensory Perception. *Neuron* 86, 1304–1316.
- 823 Markram, H., Lübke, J., Frotscher, M., Roth, A., and Sakmann, B. (1997). Physiology and  
824 anatomy of synaptic connections between thick tufted pyramidal neurones in the  
825 developing rat neocortex. *J. Physiol.* 500, 409–440.
- 826 Markram, H., Muller, E., Ramaswamy, S., Reimann, M.W., Abdellah, M., et al., 2015.  
827 Reconstruction and Simulation of Neocortical Microcircuitry. *Cell* 163, 456–492.  
828 doi:10.1016/j.cell.2015.09.029
- 829 Matsuzaki, M., Honkura, N., Ellis-Davies, G.C.R., and Kasai, H. (2004). Structural basis of  
830 long-term potentiation in single dendritic spines. *Nature* 429, 761–766.
- 831 Nessler, B., Pfeiffer, M., Buesing, L., and Maass, W. (2013). Bayesian Computation Emerges  
832 in Generic Cortical Microcircuits through Spike-Timing-Dependent Plasticity. *PLoS*  
833 *Comput Biol* 9, e1003037.
- 834 Orbán, G., Berkes, P., Fiser, J., and Lengyel, M. (2016). Neural Variability and  
835 Sampling-Based Probabilistic Representations in the Visual Cortex. *Neuron* 92, 530–543.
- 836 Pfister, J.-P., Toyoizumi, T., Barber, D., and Gerstner, W. (2006). Optimal  
837 Spike-Timing-Dependent Plasticity for Precise Action Potential Firing in Supervised  
838 Learning. *Neural Comput.* 18, 1318–1348.
- 839 Robert, C., and Casella, G. (2013). Monte Carlo Statistical Methods (Springer Science &  
840 Business Media).
- 841 Schmidt, H., Gour, A., Straehle, J., Boergens, K.M., Brecht, M., and Helmstaedter, M. (2017).  
842 Axonal synapse sorting in medial entorhinal cortex. *Nature* 549, 469–475.
- 843 Scholl, B., Wilson, D.E., and Fitzpatrick, D. (2017). Local Order within Global Disorder:  
844 Synaptic Architecture of Visual Space. *Neuron* 96, 1127–1138.e4.
- 845 Segev, I., and London, M. (2000). Untangling Dendrites with Quantitative Models. *Science*  
846 290, 744–750.
- 847 Simoncelli, E.P., and Olshausen, B.A. (2001). Natural Image Statistics and Neural  
848 Representation. *Annu. Rev. Neurosci.* 24, 1193–1216.
- 849 Sjöström, P.J., and Häusser, M. (2006). A Cooperative Switch Determines the Sign of

- 850        Synaptic Plasticity in Distal Dendrites of Neocortical Pyramidal Neurons. *Neuron* 51, 227–  
851        238.
- 852        Smith, S.L., Smith, I.T., Branco, T., and Häusser, M. (2013). Dendritic spikes enhance  
853        stimulus selectivity in cortical neurons in vivo. *Nature* 503, 115–120.
- 854        Soltani, A., and Wang, X.-J. (2010). Synaptic computation underlying probabilistic inference.  
855        *Nat. Neurosci.* 13, 112–119.
- 856        Staras, K., Branco, T., Burden, J.J., Pozo, K., Darcy, K., Marra, V., Ratnayaka, A., and Goda, Y.  
857        (2010). A Vesicle Superpool Spans Multiple Presynaptic Terminals in Hippocampal  
858        Neurons. *Neuron* 66, 37–44.
- 859        Stuart, G., and Spruston, N. (1998). Determinants of Voltage Attenuation in Neocortical  
860        Pyramidal Neuron Dendrites. *J. Neurosci.* 18, 3501–3510.
- 861        Swindale, N.V. (1998). Orientation tuning curves: empirical description and estimation of  
862        parameters. *Biol. Cybern.* 78, 45–56.
- 863        Ujfalussy, B.B., Makara, J.K., Branco, T., and Lengyel, M. (2015). Dendritic nonlinearities are  
864        tuned for efficient spike-based computations in cortical circuits. *eLife* e10056.
- 865        Urbanczik, R., and Senn, W. (2014). Learning by the Dendritic Prediction of Somatic Spiking.  
866        *Neuron* 81, 521–528.
- 867        Watanabe, S. (2001). Algebraic Analysis for Nonidentifiable Learning Machines. *Neural*  
868        *Comput.* 13, 899–933.
- 869        Wiegert, J.S., and Oertner, T.G. (2013). Long-term depression triggers the selective  
870        elimination of weakly integrated synapses. *Proc. Natl. Acad. Sci. U. S. A.* 110,  
871        E4510–4519.
- 872        Williams, S.R., and Stuart, G.J. (2003). Role of dendritic synapse location in the control of  
873        action potential output. *Trends Neurosci.* 26, 147–154.
- 874
